# Supplementary material for: Multimodal superparamagnetic nanoplatform for clinical applications: immunoassays, imaging & therapy
Source: Royal Society of Chemistry journal article supplement (doi:10.1039/c005286h), 2010-09-24
Supplement: c005286h.pdf [file c005286h.pdf]

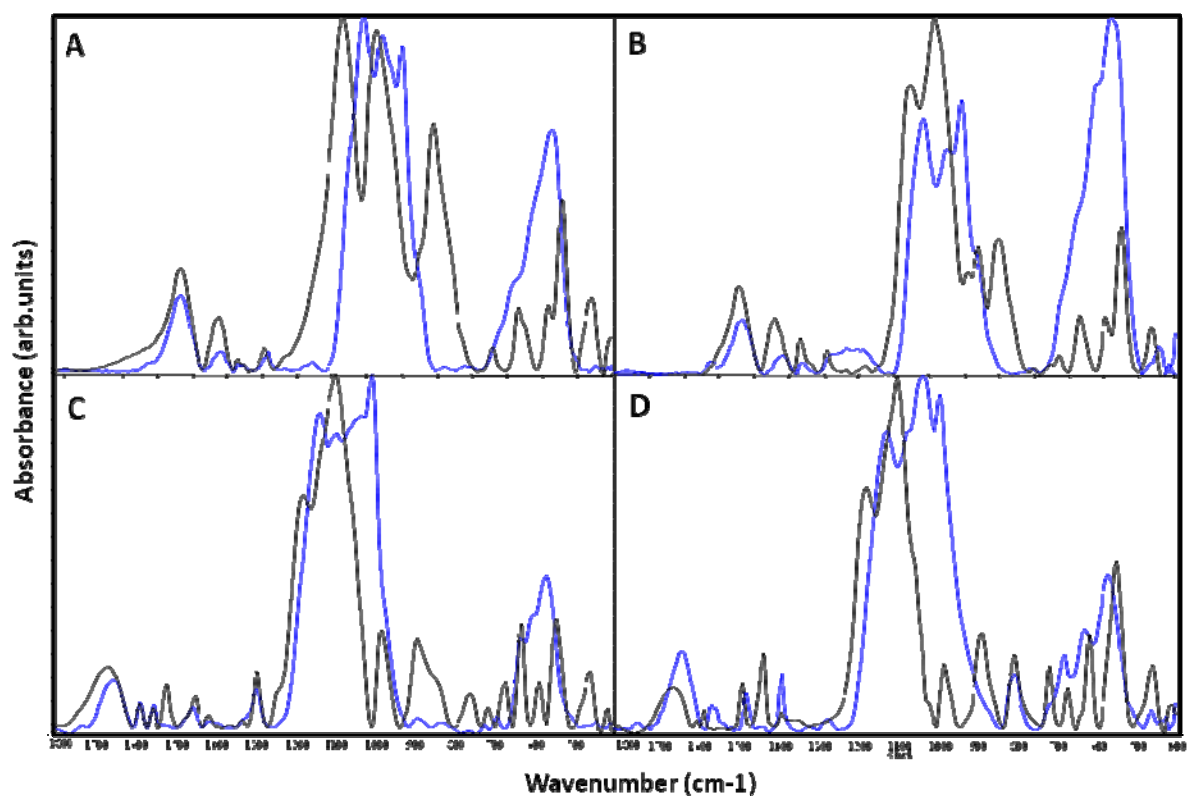

Figure S1. IR spectroscopy in KBr pellets: free HMBP molecules (black curve) and  $\gamma\text{Fe}_2\text{O}_3$ @HMBP nanocrystals (blue curve); (A) Alendronate, (B) Neridronate, (C) Zoledronate and (D) Risedronate

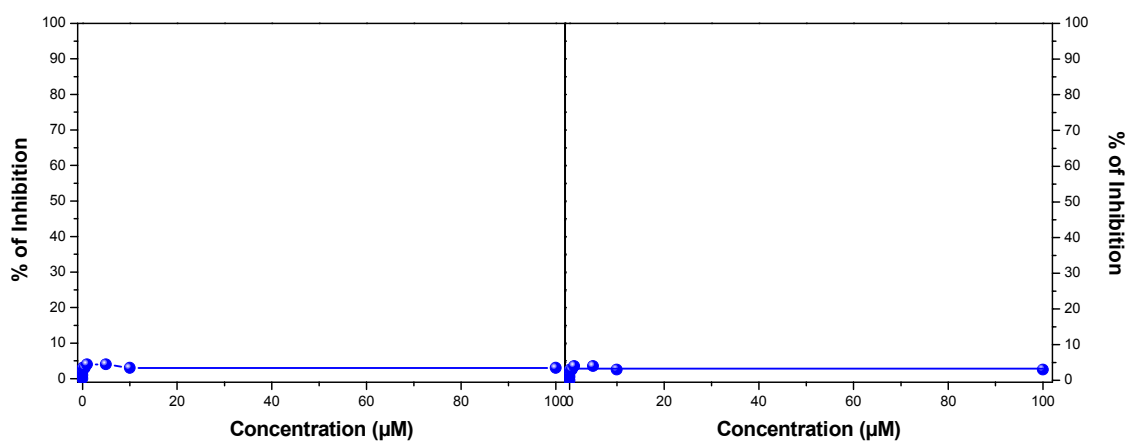

Figure S2. Comparative effects HUVEC cell proliferation for 48hrs  $\gamma\text{Fe}_2\text{O}_3$ @HMBP (A) Alendronate (B) Neridronate
